# Supplementary material for: The Chorioallantoic Membrane Assay in Nanotoxicological Research—An Alternative for In Vivo Experimentation
Source: PubMed Central journal article supplement (PMC7760845; doi:10.3390/nano10122328), 2020-11-24
Supplement: nanomaterials-10-02328-s001.pdf [file nanomaterials-10-02328-s001.pdf]

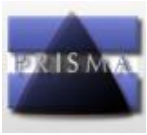

## PRISMA 2009 Flow Diagram

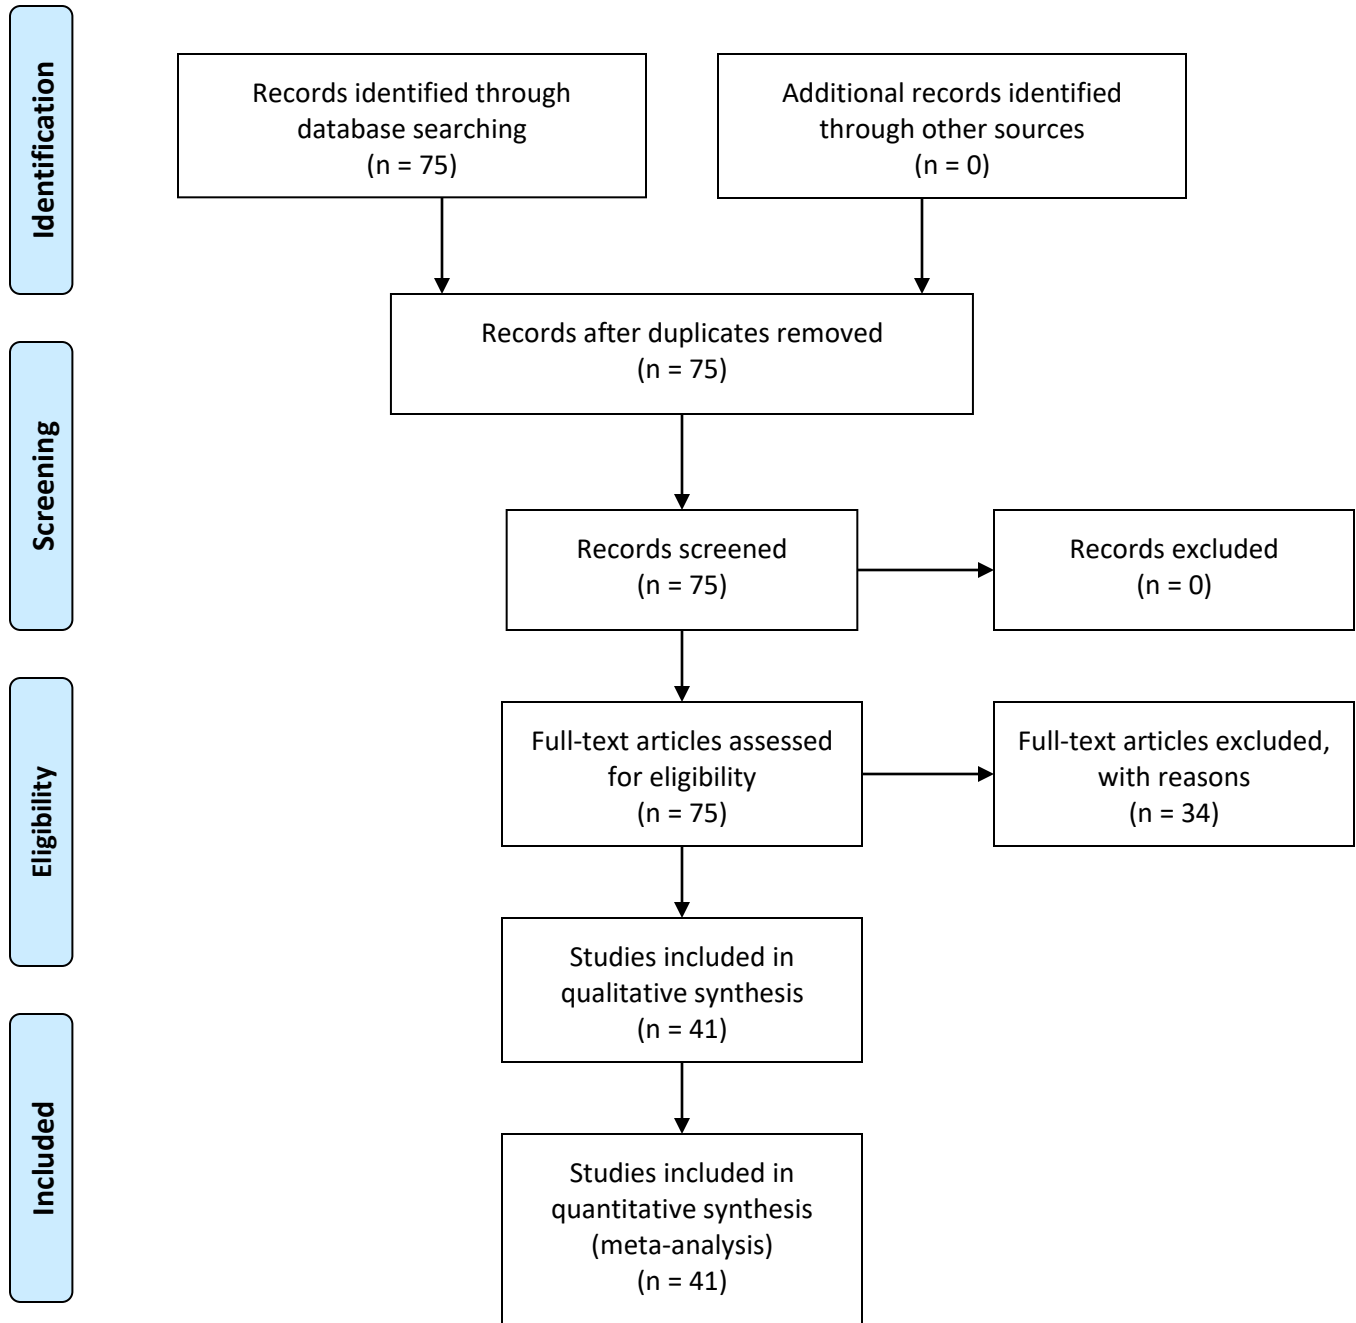

From: Moher D, Liberati A, Tetzlaff J, Altman DG, The PRISMA Group (2009). Preferred Reporting Items for Systematic Reviews and Meta-Analyses: The PRISMA Statement. PLoS Med 6(7): e1000097. doi:10.1371/journal.pmed1000097

For more information, visit [www.prisma-statement.org](http://www.prisma-statement.org).
